# Supplementary material for: Low genetic diversity in the locus encoding the Plasmodium vivax P41 protein in Colombia’s parasite population
Source: PubMed Central journal article supplement (PMC4190493; doi:10.1186/1475-2875-13-388), 2014-09-30
Supplement: 12936_2014_3548_MOESM2_ESM.pdf [file 12936_2014_3548_MOESM2_ESM.pdf]

**Additional file 2 Nucleotide diversity ( $\pi$ ) values for subpopulations within Colombia**

| <b>n</b> | <b>Location</b> | <b>Ss</b> | <b>S</b> | <b>Ps</b> | <b>H</b> | <b>k</b> | <b><math>\pi</math></b> |
|----------|-----------------|-----------|----------|-----------|----------|----------|-------------------------|
| 14       | North-west      | 9         | 1        | 8         | 6        | 3.6      | 0.0032 (0.0005)         |
| 3        | Midwest         | 7         | 7        | 0         | 2        | 4.7      | 0,0042 (0.0019)         |
| 4        | South-west      | 1         | 1        | 0         | 2        | 0.5      | 0.0004 (0.0002)         |
| 9        | South-east      | 9         | 1        | 8         | 4        | 3.3      | 0.0029 (0.0011)         |

n: number of isolates, Ss: number of segregant sites, S: number of singleton sites, Ps: number of parsimony-informative sites, H: number of haplotypes, *k*: average number of nucleotide differences by sequence pairs,  $\pi$ : nucleotide diversity per site.
